# Supplementary material for: Disassembly activity of actin-depolymerizing factor (ADF) is associated with distinct cellular processes in apicomplexan parasites
Source: PubMed Central journal article supplement — Mol Biol Cell. 2015 Sep 1;26(17):3001–12. doi: 10.1091/mbc.E14-10-1427 (PMC4551315; doi:10.1091/mbc.e14-10-1427), 2015-09-01
Supplement: supp_E14-10-1427v1_CombinedSupMats.pdf [file supp_E14-10-1427v1_CombinedSupMats.pdf]

# Supplemental Materials

*Molecular Biology of the Cell*

Haase et al.

**Figure S1 Haase *et al***

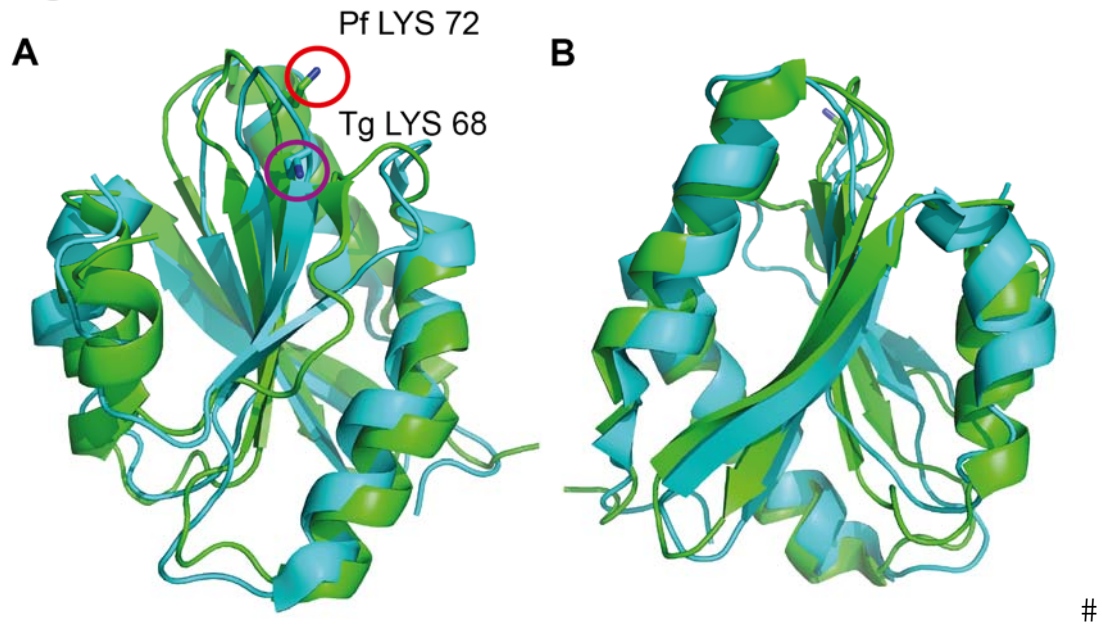

**Figure S1.** Superimposition of PfADF1 (in green, (Wong *et al.*, 2011)) and TgADF (in turquoise, (Yadav *et al.*, 2011)) displays high structural similarity. The Lys<sup>68/72</sup> residues are depicted in blue and circled in red or purple for PfADF1<sub>K72</sub> and TgADF<sub>K68</sub> respectively.

Figure S2 Haase *et al*

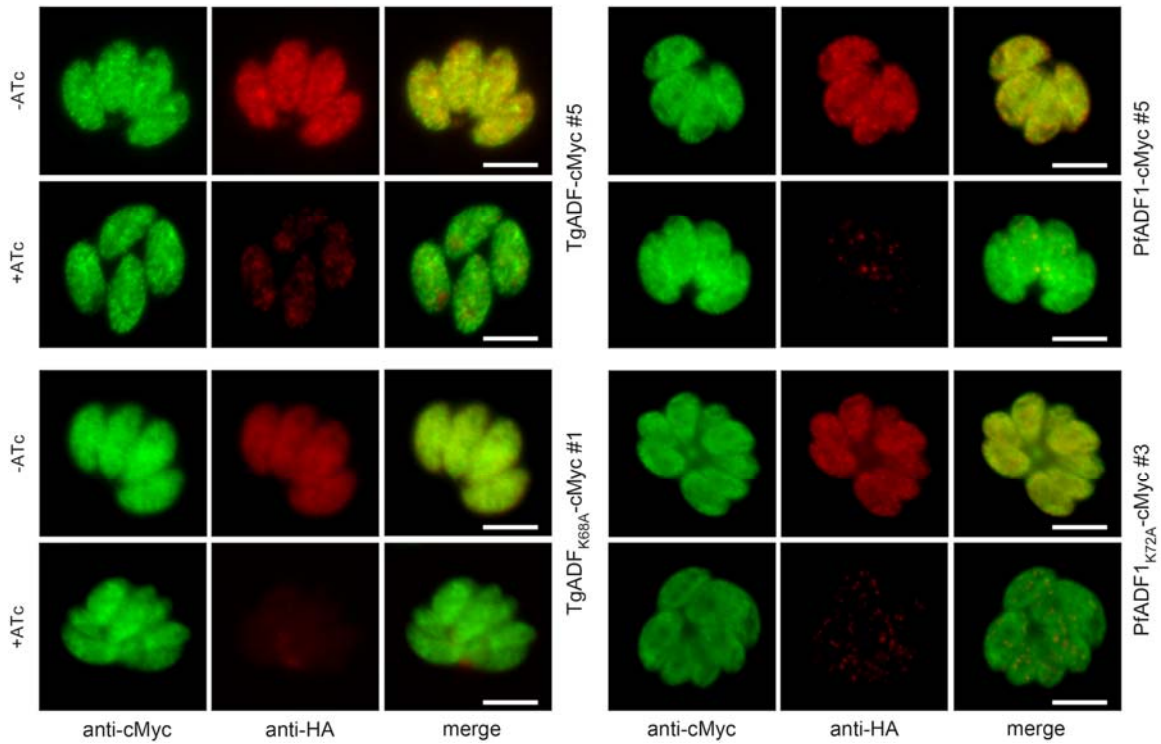

**Figure S2.** Immunofluorescence analysis of the additional clones (not shown in Figure 1) grown in the absence and presence of ATc. TgADF-HA and the complementing cMyc-tagged proteins are evenly distributed throughout the cytosol.

Figure S3 Haase *et al*

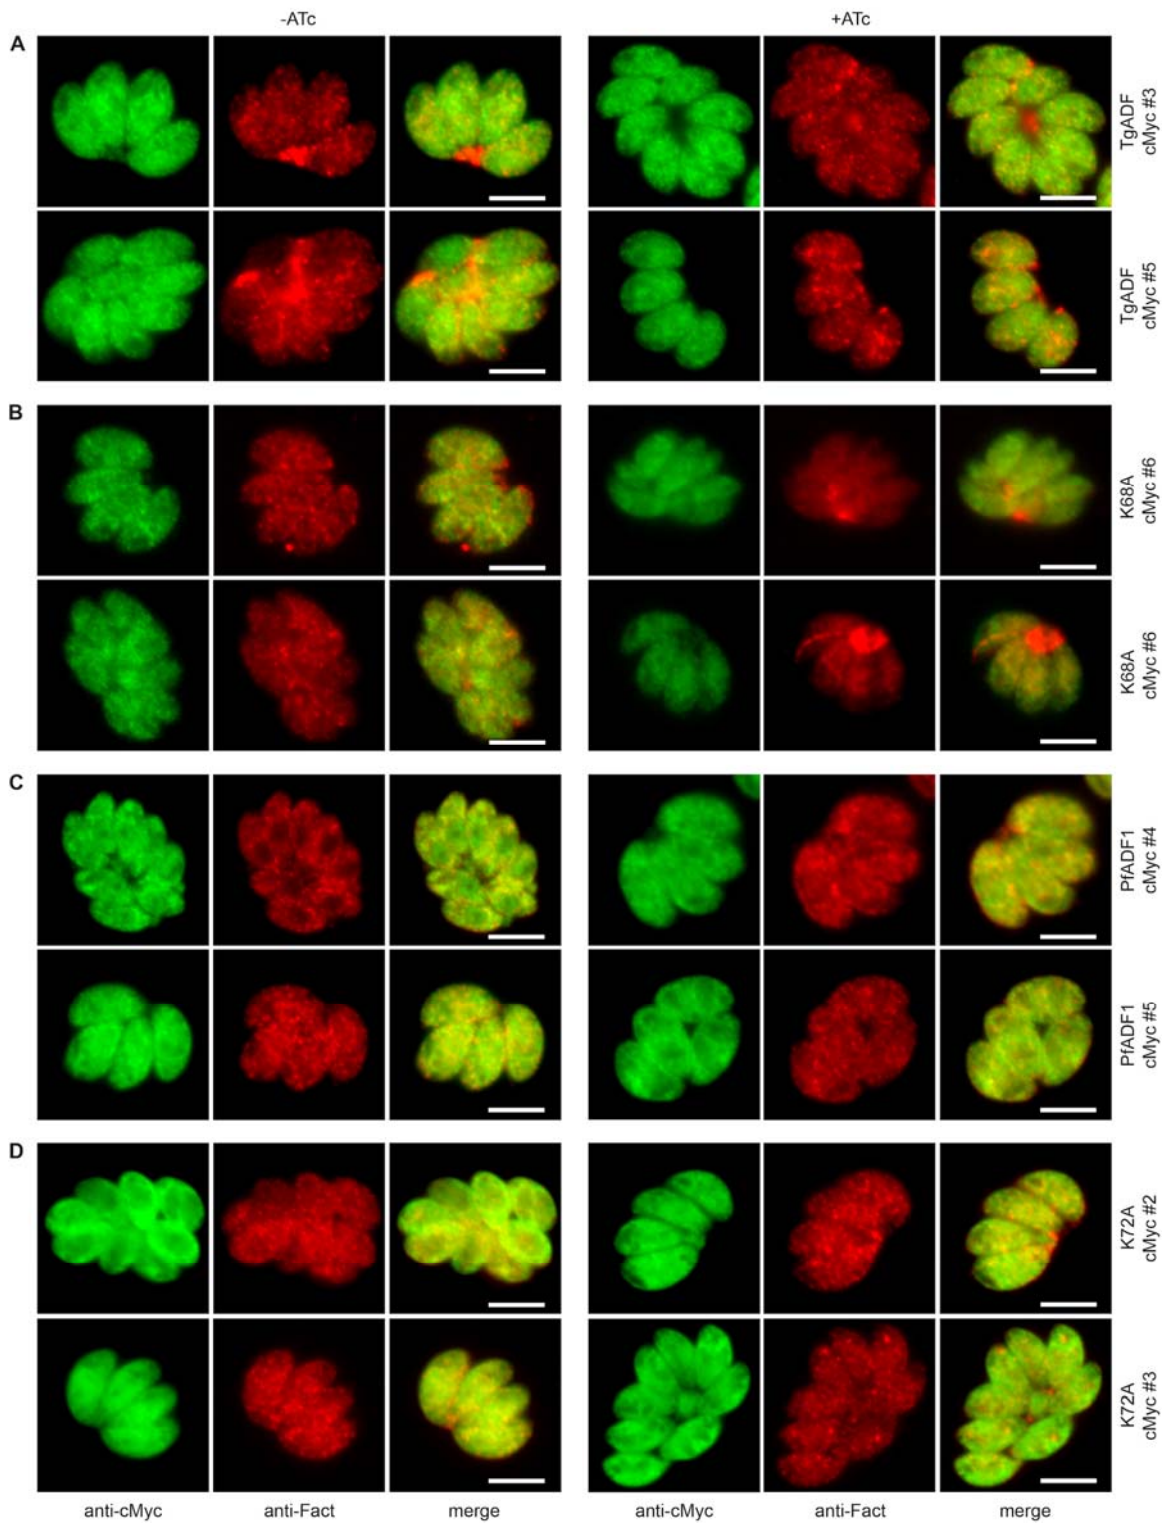

Figure S3. Actin is normally distributed in intracellular parasites.

Figure S4 Haase *et al*

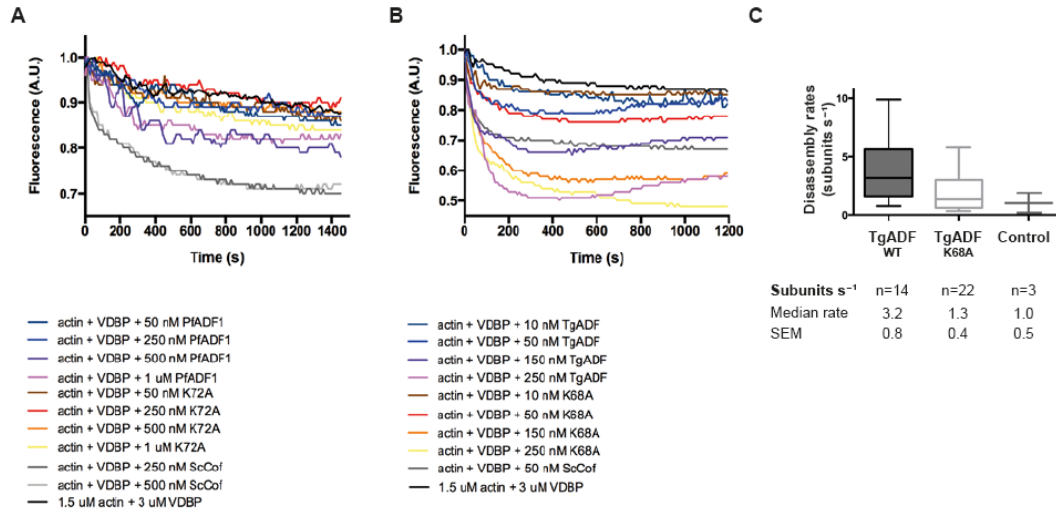

**Figure S4.(A-B)** F-actin disassembly assays using pyrene-labeled actin, induced by vitamin D-binding protein (VDBP). A range of wild type and mutant ADF protein concentrations, as well as ScCoF (dark grey), were tested on preassembled 1.5  $\mu$ M F-actin (10% pyrene-actin). Fluorescence intensities of each experiment were normalized as such that maximum fluorescence is 1.0. Actin only is shown in black. **C)** Disassembly rates (given as subunits/s) as measured by TIRF microscopy from the barbed and pointed end of 5 filaments per protein at 100 nM (control 3) with n = number of total ends measured over time. Median rates and SEM are shown below. Error bars on graph indicate min/max values.

**Table S1** Quantification of plaques from two independent experiments

| Set 1 <sup>a</sup> | TgADF cKO       | TgADF #3  | TgADF #5  | TgADF <sub>K68A</sub> #1  | TgADF <sub>K68A</sub> #6  |
|--------------------|-----------------|-----------|-----------|---------------------------|---------------------------|
| -ATc               | 46              | 41        | 56        | 48                        | 51                        |
| +ATc               | 0               | 40        | 55        | 0                         | 0                         |
| Set 2 <sup>a</sup> | TgADF cKO       | TgADF #3  | TgADF #5  | TgADF <sub>K68A</sub> #1  | TgADF <sub>K68A</sub> #6  |
| -ATc               | 42              | 37        | 60        | 54                        | 45                        |
| +ATc               | 0               | 32        | 63        | 0                         | 0                         |
| Set 1 <sup>a</sup> | WT <sup>b</sup> | PfADF1 #4 | PfADF1 #5 | PfADF1 <sub>K72A</sub> #2 | PfADF1 <sub>K72A</sub> #3 |
| -ATc               | 30              | 48        | 53        | 55                        | 48                        |
| +ATc               | 32              | 56        | 52        | 52                        | 51                        |
| Set 2 <sup>a</sup> | WT <sup>b</sup> | PfADF1 #4 | PfADF1 #5 | PfADF1 <sub>K72A</sub> #2 | PfADF1 <sub>K72A</sub> #3 |
| -ATc               | 66              | 65        | 67        | 64                        | 25                        |
| +ATc               | 87              | 78        | 72        | 61                        | 23                        |

<sup>a</sup>Mean from duplicates per line, clone and condition ( $\pm$ ATc).

<sup>b</sup>Untransfected  $\Delta$ KU80 parasites were used as a wild type reference line.
